# Supplementary material for: The First Mutation Identified in a Chinese Acrodysostosis Patient Confirms a p.G289E Variation of PRKAR1A Causes Acrodysostosis
Source: PubMed Central journal article supplement (PMC4159793; doi:10.3390/ijms150813267), 2014-07-29
Supplement: ijms-15-13267-s001.pdf [file ijms-15-13267-s001.pdf]

## Supplementary Information

**Table S1.** Primers designed for PCR amplification and sequencing of *PRKARIA* gene.

| <b>Primer Name</b>  | <b>Primer Sequence (from 5' to 3')</b> | <b>Size (bp)/AT * (°C)</b> |
|---------------------|----------------------------------------|----------------------------|
| <i>PRKARIA</i> -1F  | GGCAGCGACAGGACTCTCCC                   | 905/62.5                   |
| <i>PRKARIA</i> -1R  | GCACCAAAGCCAACGCCAG                    | -                          |
| <i>PRKARIA</i> -2F  | TATTCCTAGTCCCCACTTCC                   | 572/53.5                   |
| <i>PRKARIA</i> -2R  | ACCCTTTATTAGCCAAGTACAGT                | -                          |
| <i>PRKARIA</i> -3F  | TGCCCATTAATAAAGGATAGCAT                | 633/54.4                   |
| <i>PRKARIA</i> -3R  | GCAAGGAAATAACAAACCCCAA                 | -                          |
| <i>PRKARIA</i> -4F  | AGTTTTGCCTCAGAATAATGACC                | 845/53.5                   |
| <i>PRKARIA</i> -4R  | TCCCAATACAAAGTGTTCTGTC                 | -                          |
| <i>PRKARIA</i> -5F  | TCCCCTGAAAGATTGTGT                     | 481/55                     |
| <i>PRKARIA</i> -5R  | TTGAACTCTGGGCTCAAGCA                   | -                          |
| <i>PRKARIA</i> -6F  | CATTTAACTCGTCAGAAATCACC                | 591/52                     |
| <i>PRKARIA</i> -6R  | ATGACCAGCACATATATAACCAGA               | -                          |
| <i>PRKARIA</i> -7F  | GTGATAGGCTCAGGTATAAACCG                | 464/51                     |
| <i>PRKARIA</i> -7R  | GAAGGCTTTTCCCAAGTCCAT                  | -                          |
| <i>PRKARIA</i> -8F  | AATCCTGCTCAGACTAGAGGT                  | 381/53.5                   |
| <i>PRKARIA</i> -8R  | CTTCCCTCTTAGAGCGTACAAC                 | -                          |
| <i>PRKARIA</i> -9F  | AGCACCTTAGCTTGATACGAA                  | 594/53.5                   |
| <i>PRKARIA</i> -9R  | CACGAGGACGATTCATCAGT                   | -                          |
| <i>PRKARIA</i> -10F | CCTGAATTTTATTTTCTAACTGC                | 1033/51                    |
| <i>PRKARIA</i> -10R | AAAAGTATTTTCAAGATTGGAG                 | -                          |
| <i>PRKARIA</i> -11F | GTTGTTGTTTGCCAAGCTA                    | 976/51                     |
| <i>PRKARIA</i> -11R | AAAAATCTACCATGACCAA                    | -                          |
| <i>PRKARIA</i> -12F | GGCACTTTTATTTTCATTGTGAT                | 988/51                     |
| <i>PRKARIA</i> -12R | CCACCCGAGTAGACTTTTCG                   | -                          |

\* AT: Anneal Temperature.
